# Supplementary material for: Effect of Date Fruit Consumption on the Glycemic Control of Patients with Type 2 Diabetes: A Randomized Clinical Trial
Source: MDPI journal article supplement (doi:10.3390/nu14173491), 2022-08-25

**Figure Supplementary S1.** Blood glucose comparisons derived from the patient blood glucose profiles using home blood glucose monitoring over the 12-week period of the trial, showing that there were no between or within group changes for either the date fruit or the raisins groups.

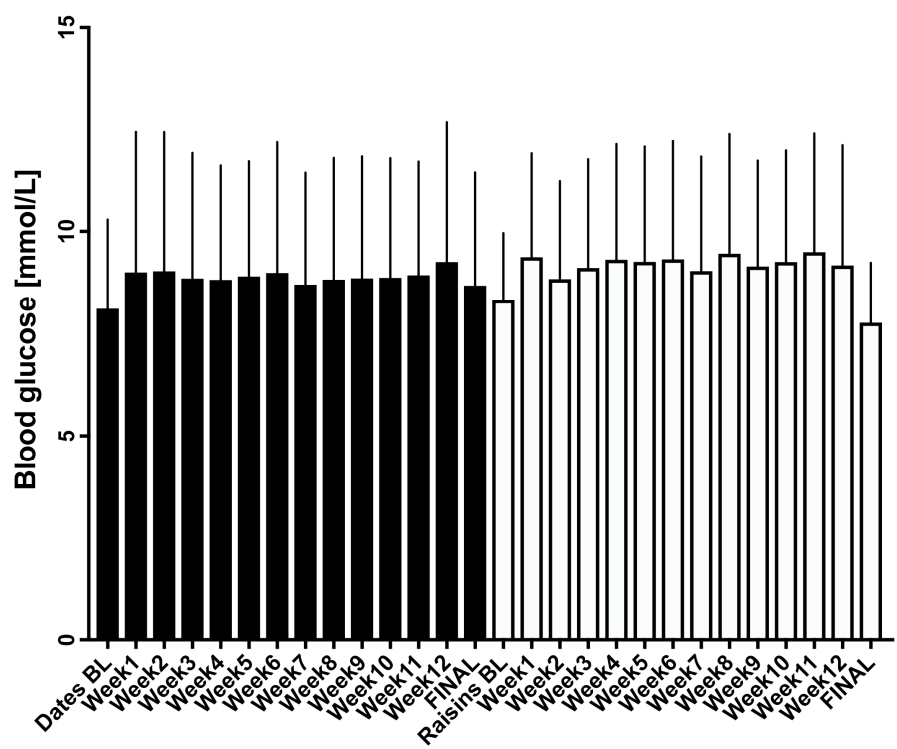

Supplement: s1 [file s1]
